# Supplementary material for: Impaired Bestrophin Channel Activity in an iPSC-RPE Model of Best Vitelliform Macular Dystrophy (BVMD) from an Early Onset Patient Carrying the P77S Dominant Mutation
Source: MDPI journal article supplement (doi:10.3390/ijms23137432), 2022-07-04

**Supplementary Figure S3.** Forward and reverse Sanger sequences of Fi21/01 iPSC- RPE showing the c.229C>T heterozygous variant in *BEST1*.

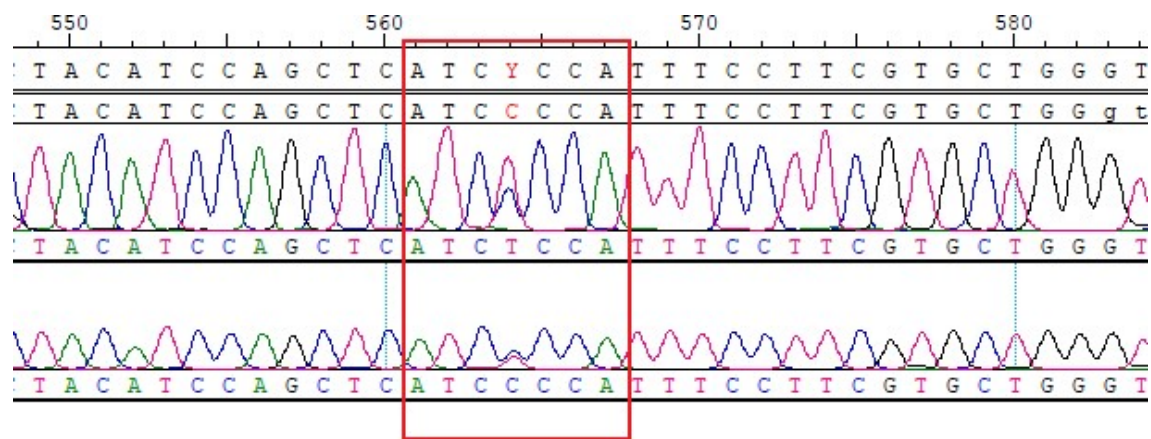

Supplement: s1 [file s1]
