# Supplementary material for: Impaired Bestrophin Channel Activity in an iPSC-RPE Model of Best Vitelliform Macular Dystrophy (BVMD) from an Early Onset Patient Carrying the P77S Dominant Mutation
Source: MDPI journal article supplement (doi:10.3390/ijms23137432), 2022-07-04
Supplement: s1 [file s1]

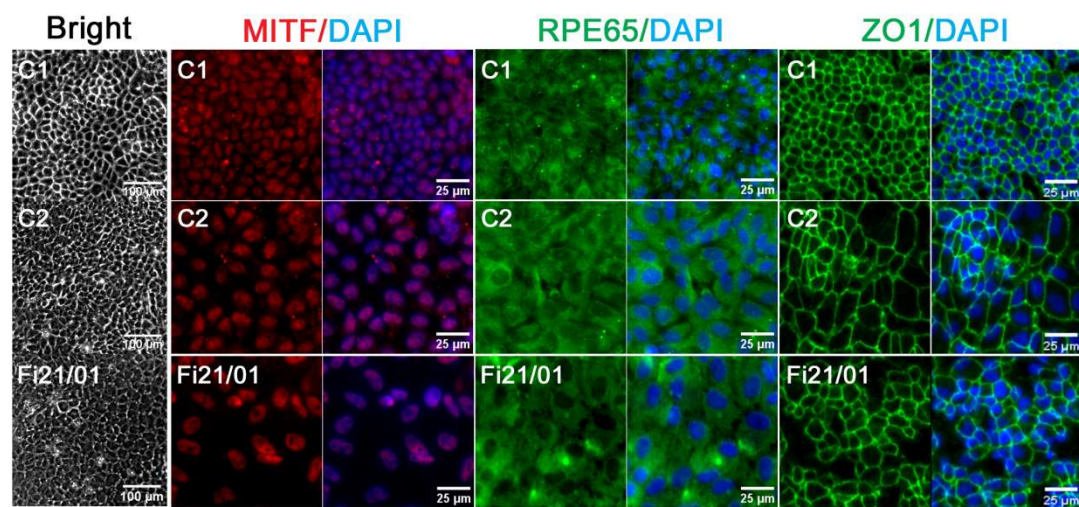

**Supplementary Figure S1.** Cell morphology (brightfield) and expression of several RPE markers (MITF, RPE65 and ZO-1) in iPSC-RPE cells from both controls and Fi21/01 cells.
